# Supplementary material for: Destructive fibrotic teamwork: how both microenvironment stiffness and profibrotic interleukin 13 impair alveolar macrophage phenotype and function
Source: Royal Society of Chemistry journal article supplement (doi:10.1039/d2bm00828a), 2022-01-01
Supplement: d2bm00828a1.pdf [file d2bm00828a1.pdf]

### **Supplemental Information**

#### **Destructive fibrotic teamwork: how both microenvironment stiffness and profibrotic Interleukin 13 impair alveolar macrophage phenotype and function**

*Kartik Bomb, Lina Pradhan, Qi Zhang, Bader M. Jarai, Arnab Bhattacharjee, David L. Burris, April M. Kloxin\*, Catherine A. Fromen\**

#### **Supplemental figures**

Figure S1: <sup>1</sup>H NMR spectra for PEG-4-Nb

Figure S2: <sup>1</sup>H NMR spectra for LAP

Figure S3: Mass spectrometry of dithiol linker peptide

Figure S4: Mass spectrometry of integrin binding peptide

Figure S5: Mass spectrometry of scrambled integrin binding peptide

Figure S6: Representative flow cytometry gating

Figure S7: Gene expression analysis for Soft (-) and Stiff (-) hydrogels

Figure S8: Metabolic activity of MH-S cells on hydrogels over time

Figure S9: Comparison between the contact modulus and the *in situ* modulus of the hydrogels.

#### **Supplemental Tables**

Table S1. RT-PCR primers used to measure gene expression.

Table S2: ELISA analysis of secreted cytokines

Table S3: DOE analysis of cell area

Table S4: DOE analysis of normalized CD206 marker expression

Table S5: DOE analysis of normalized CD86 marker expression

Table S6: DOE analysis of normalized CD80 marker expression

Table S7: DOE analysis of normalized TGF- $\beta$  secretion

Table S8: DOE analysis of normalized CCL2 secretion

Table S9: DOE analysis of normalized TNF- $\alpha$  secretion

Table S10: DOE analysis of normalized IL-1 $\beta$  secretion

Table S11: DOE analysis of %PC +ve cells

Table S12: DOE analysis of normalized MFI for phagocytosis assay

Table S13: DOE analysis of %PS +ve cells

Table S14: DOE analysis of normalized MFI for efferocytosis assay

Table S15: Validation of DOE model using CD80 and CD86 normalized marker expression.

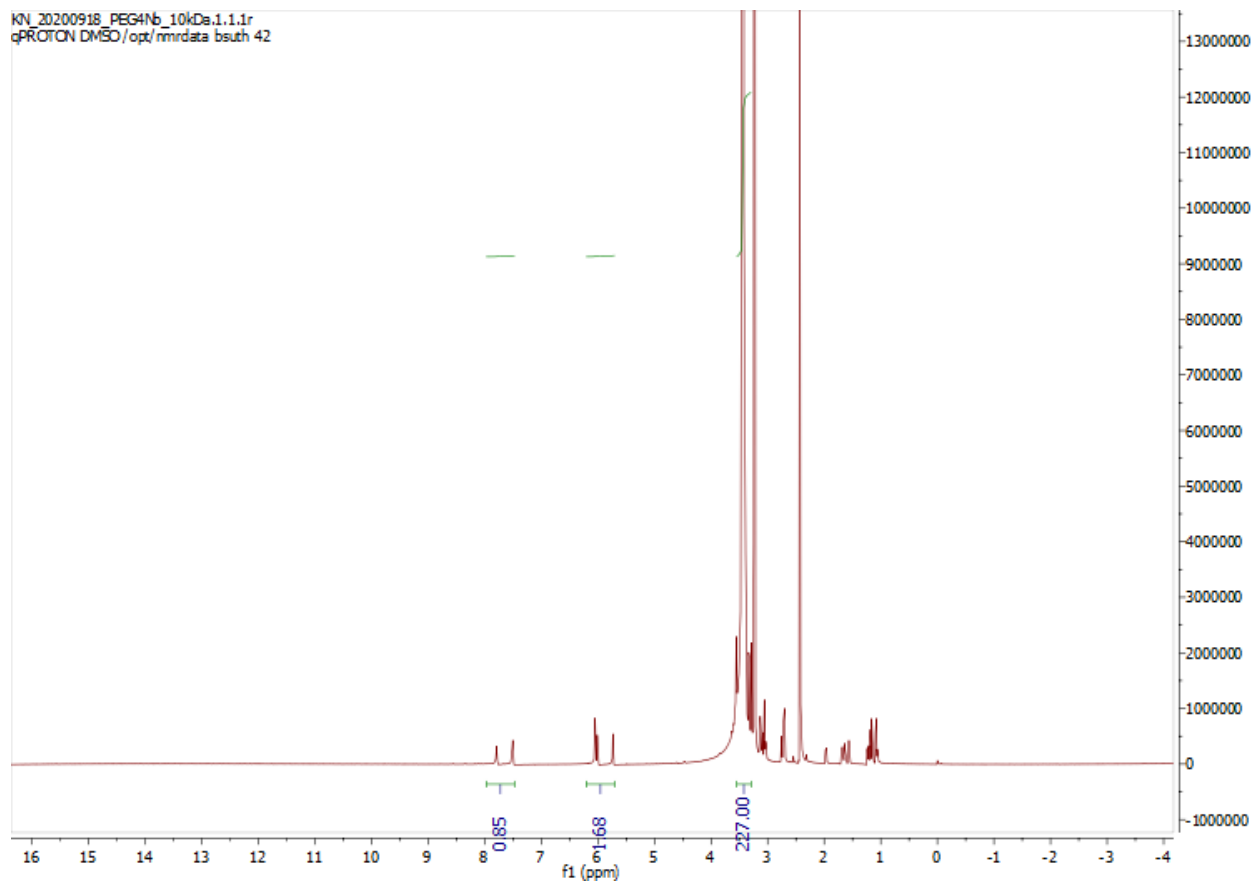

**Figure S1: <sup>1</sup>H NMR spectra for PEG-4-Nb.** The extent of norbornene functionalization for 4-arm PEG (10kDa) was determined by appearance of proton peaks corresponding to the norbornene double bond (2H,  $\delta$  6.20-5.86 ppm). The peaks were normalized to the PEG backbone protons (227H,  $\delta$  3.65-3.40 ppm). ~85% functionalization was achieved for the batch.

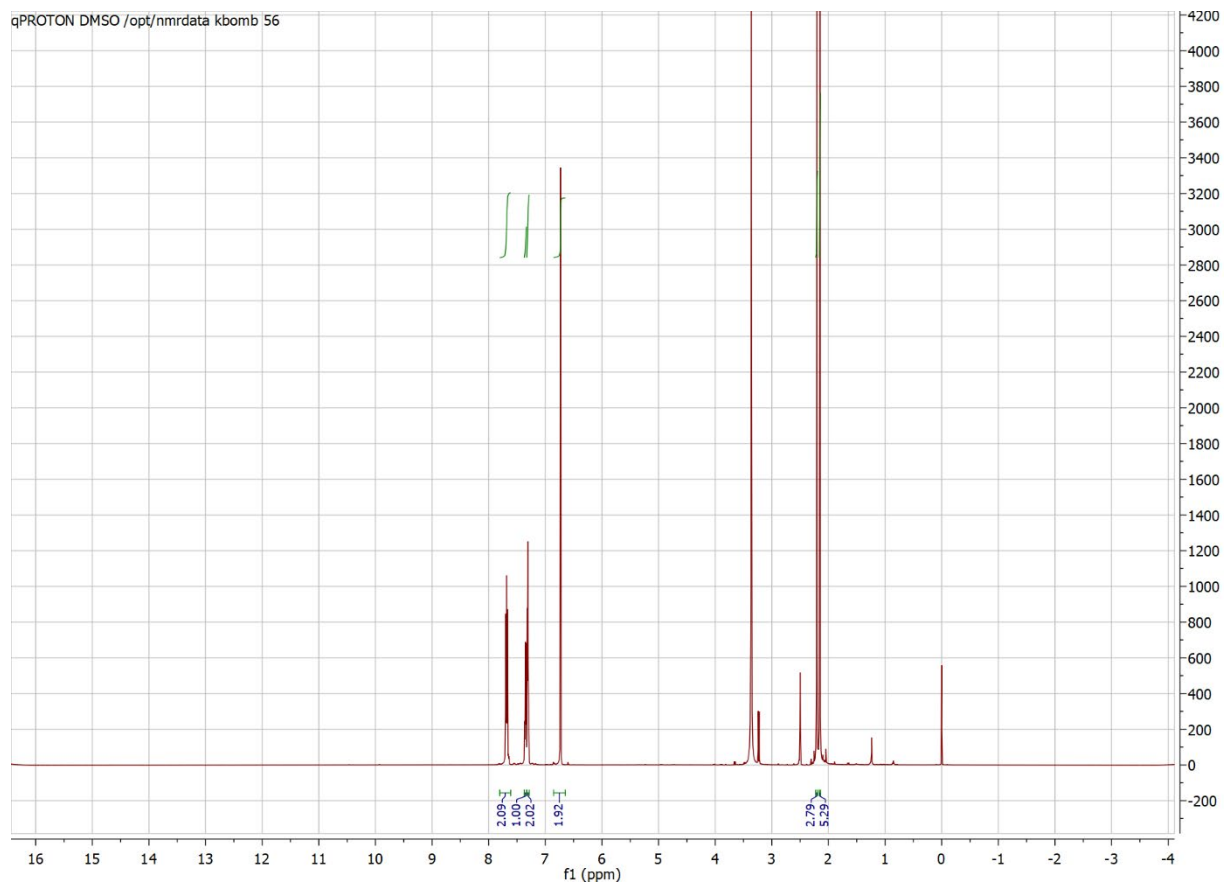

**Figure S2.**  $^1\text{H}$  NMR spectra for LAP. The successful reaction was confirmed by appearance of the LAP protons:  $\delta$  7.59 (m, 2H), 7.44 (m, 1H), 7.36 (m, 2H), 6.78 (s, 2H), 2.12 (s, 3H), 1.90 (s, 6H).

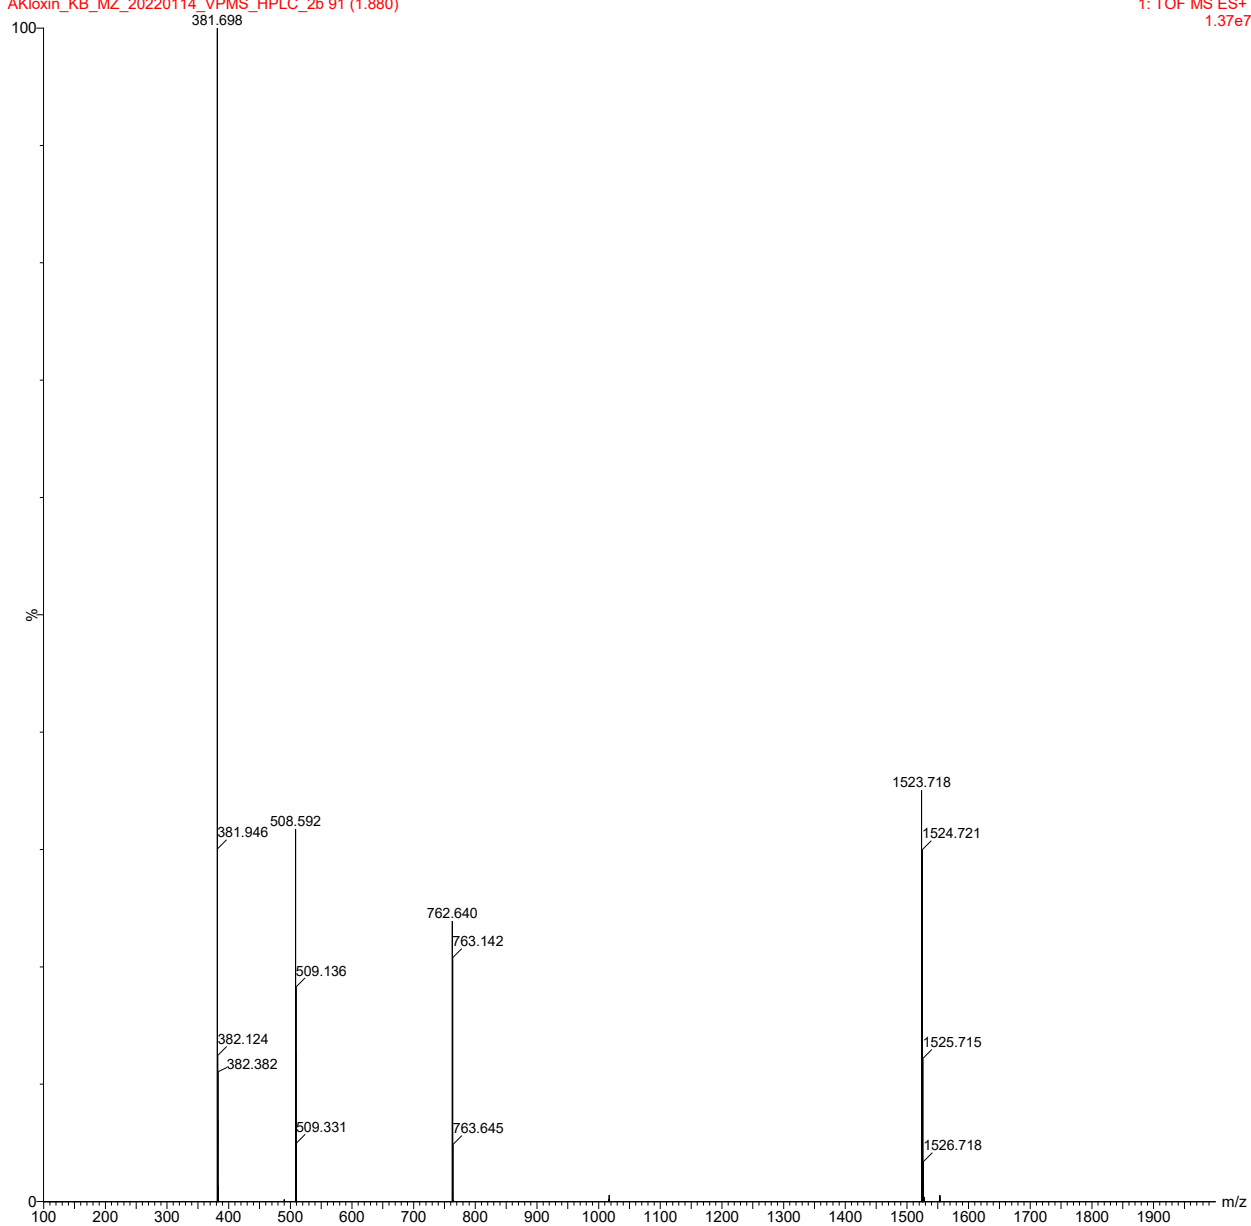

**Figure S3: Mass spectrometry of dithiol linker peptide.** Successful synthesis of dithiol crosslinker peptide (GCGKVPMSMRGGKCG-amide) was confirmed by XEVO mass spectrometry. Expected molecular weight of 1524.9 g/mol.  $[M + H]^+ = 1525.9$  g/mol,  $[M + 2H]^+ = 763.5$  g/mol,  $[M + 3H]^+ = 509.3$  g/mol,  $[M + 4H]^+ = 382.2$  g/mol

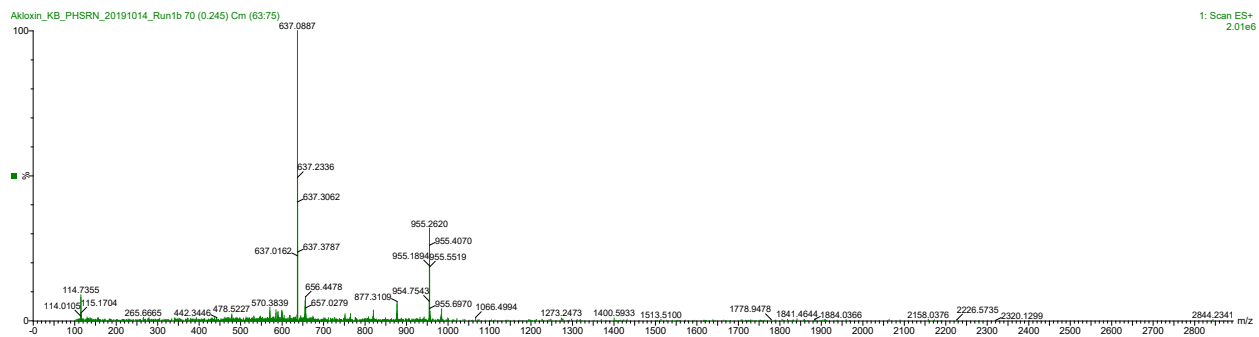

**Figure S4: Mass spectrometry of integrin binding peptide.** Successful synthesis of scrambled integrin binding peptide (CGGHRPSNG<sub>10</sub>RGSDP-amide) was confirmed by SQD2 mass spectrometry. Expected molecular weight of 1909.9 g/mol.  $[M + 2H]^+ = 956$  g/mol,  $[M + 3H]^+ = 637.7$  g/mol

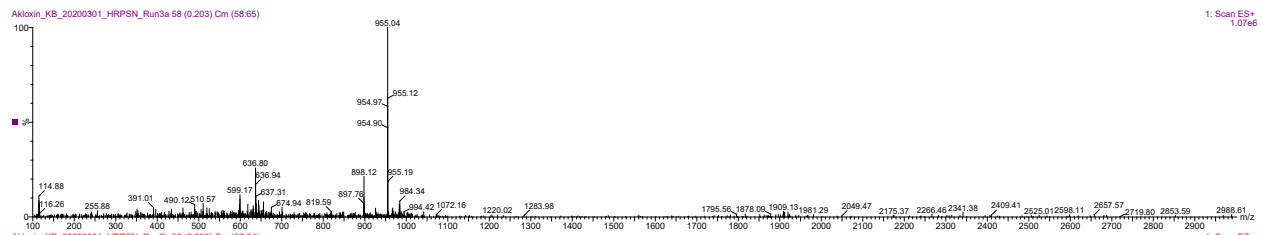

**Figure S5: Mass spectrometry of scrambled integrin binding peptide.** Successful synthesis of integrin binding peptide (CGGPHSRNG<sub>10</sub>RGDSP-amide) was confirmed by SQD2 mass spectrometry. Expected molecular weight of 1909.9 g/mol.  $[M + 2H]^+ = 956$  g/mol,  $[M + 3H]^+ = 637.7$  g/mol

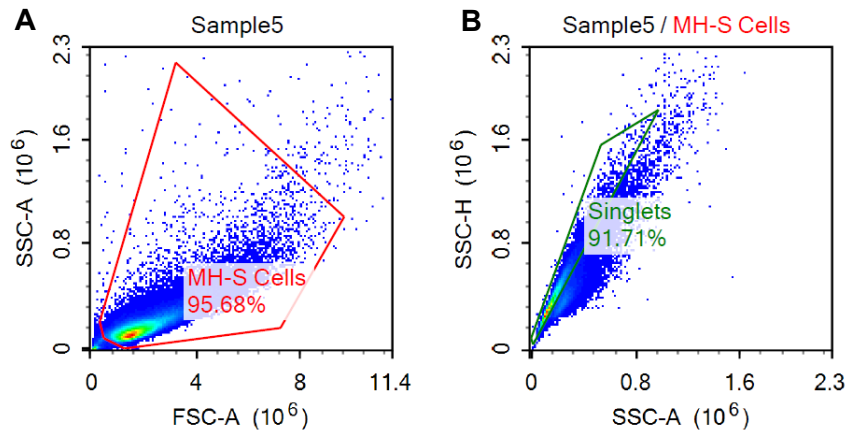

**Figure S6: Representative flow cytometry gating.** A) Flow cytometry (forward scatter area (FSC-A) vs side scatter area (SSC-A)) gating strategy to identify MH-S cells. B) Flow cytometry (side scatter area (SSC-A) vs side scatter height (SSC-H)) gating strategy to identify singlet MH-S cells.



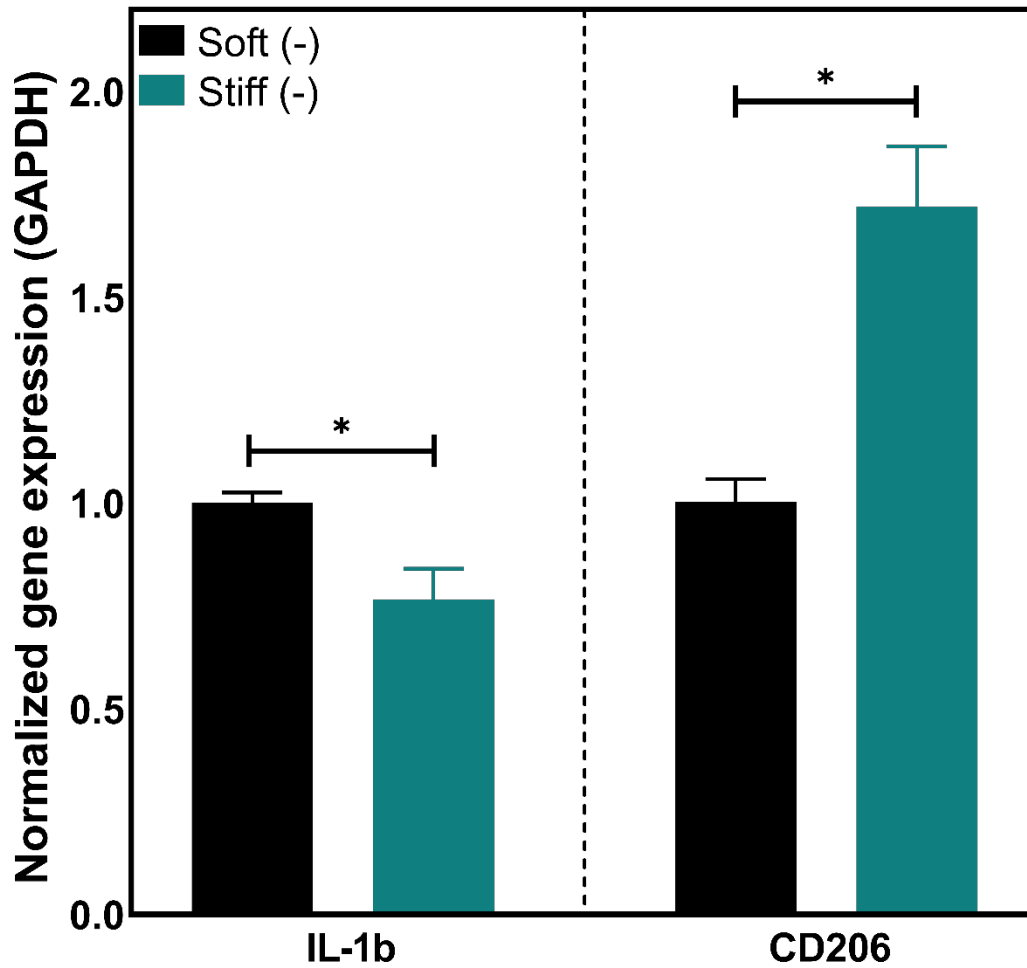

**Figure S7: Gene expression analysis for Soft (-) and Stiff (-) hydrogels.** Downregulation of M1 marker (IL-1 $\beta$ ) and upregulation of M2 marker (CD206) was also confirmed on gene level using RT-qPCR analysis.

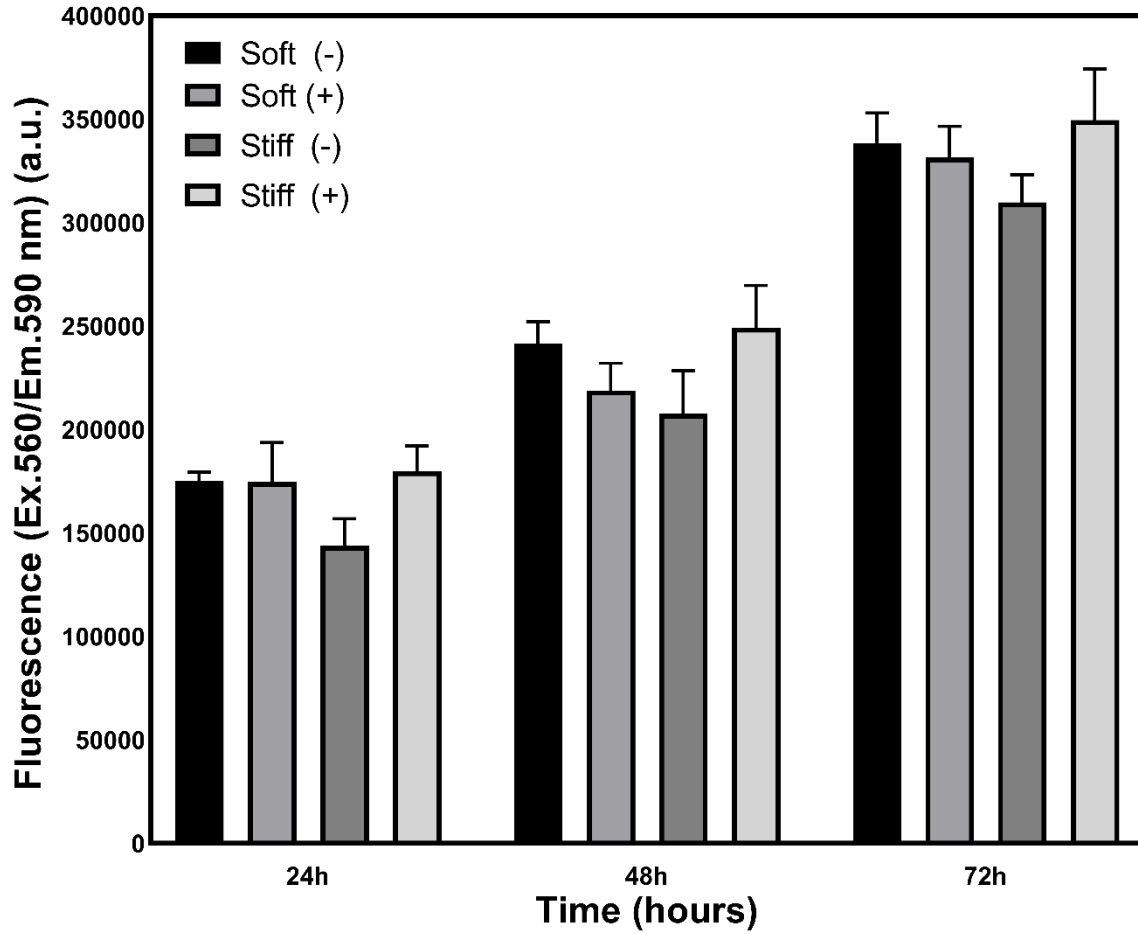

**Figure S8: Metabolic activity of MH-S cells on hydrogels over time.** Cell metabolic activity was assessed for cells seeded on hydrogels after 24, 48, and 72 hours in culture by an alamarBlue assay. Fluorescence was measured on a plate reader (Ex. 560, Em/590).

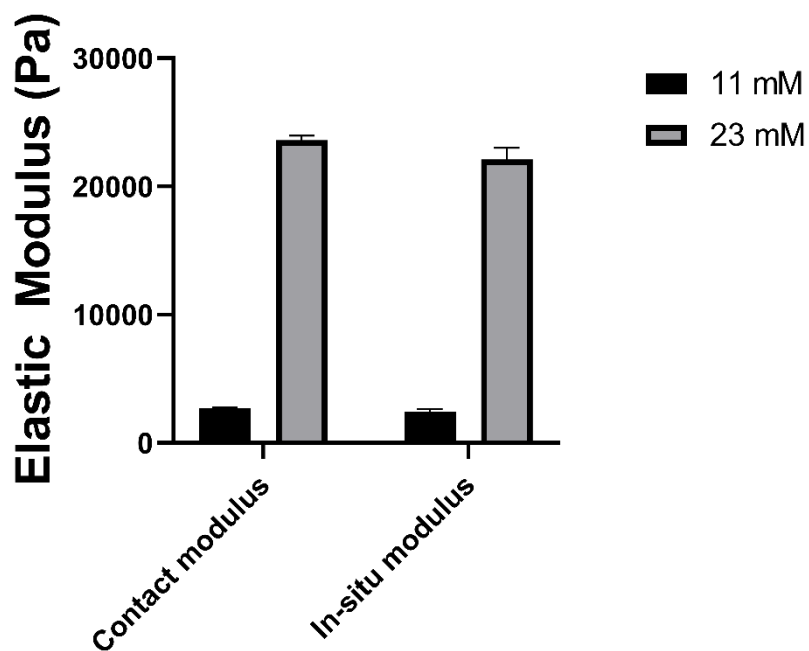

**Figure S9: Comparison between the contact modulus and the *in situ* modulus of the hydrogels.** Elastic modulus of the hydrogels for soft (11 mM) and stiff (23 mM) was measured using microindentation and in situ rheology.

|                               | <b>Forward primer</b> | <b>Reverse primer</b>   |
|-------------------------------|-----------------------|-------------------------|
| <i>GAPDH</i>                  | CCTCGTCCCGTAGACAAAATG | TCTCCACTTTGCCACTGCAA    |
| <i>CD206</i>                  | CTCTGTTCAGCTATTGGACGC | CGGAATTTCTGGGATTCAGCTTC |
| <i>IL-1<math>\beta</math></i> | GCAACTGTTCTGAACTCAACT | ATCTTTTGGGGTCCGTCAACT   |

**Table S1. RT-PCR primers used to measure gene expression.** Forward and reverse primers used to measure the relative gene expression of CD206 and IL-1 $\beta$  normalized to housekeeping gene (GAPDH)

|                      | <b>Soft (-)</b> | <b>Soft (+)</b> | <b>Stiff (-)</b> | <b>Stiff (+)</b> |
|----------------------|-----------------|-----------------|------------------|------------------|
| <i>TGF-β</i> (pg/mL) | 1442.3 ± 182.3  | 2137.6 ± 170.7  | 1400.1 ± 165.6   | 1957.8 ± 191.6   |
| <i>CCL2</i> (pg/mL)  | 7432.2 ± 294.4  | 9556 ± 126.5    | 7505.7 ± 932     | 8558 ± 538.4     |
| <i>TNF-α</i> (pg/mL) | 12.6 ± 2        | 10.9 ± 1.9      | 11.1 ± 2.9       | 8.5 ± 1.9        |
| <i>IL-1β</i> (pg/mL) | 1.8 ± 0.8       | 1.6 ± 0.3       | 1.4 ± 0.7        | 0.84 ± 0.52      |

**Table S2: ELISA analysis of secreted cytokines.** Cytokine analysis for soluble factors secreted by MH-S cells was performed using ELISA. Cells were cultured on soft or stiff hydrogels and polarized with or without IL13 for 24 hours. At least 3 technical replicates were analyzed for each condition.

### Coded Coefficients

| <b>Term</b>    | <b>Effect</b> | <b>Coef</b> | <b>SE Coef</b> | <b>T-Value</b> | <b>P-Value</b> | <b>VIF</b> |
|----------------|---------------|-------------|----------------|----------------|----------------|------------|
| Constant       |               | 181.32      | 1.95           | 92.84          | 0.000          |            |
| Stiffness      | 42.06         | 21.03       | 1.95           | 10.77          | 0.000          | 1.00       |
| IL13           | 19.31         | 9.65        | 1.95           | 4.94           | 0.001          | 1.00       |
| Stiffness*IL13 | 5.89          | 2.94        | 1.95           | 1.51           | 0.170          | 1.00       |

### Regression Equation in Uncoded Units

$$\text{Cell area} = 181.32 + 21.03 \text{ Stiffness} + 9.65 \text{ IL13} + 2.94 \text{ Stiffness*IL13}$$

**Table S3: DOE analysis of cell area:** Two-way ANOVA was performed to identify the significance of each term in promoting increased cell spread.

## Coded Coefficients

| Term           | Effect  | Coef    | SE Coef | T-Value | P-Value | VIF  |
|----------------|---------|---------|---------|---------|---------|------|
| Constant       |         | 1.7662  | 0.0464  | 38.07   | 0.000   |      |
| Stiffness      | 0.3203  | 0.1601  | 0.0464  | 3.45    | 0.005   | 1.03 |
| IL13           | 1.1160  | 0.5580  | 0.0464  | 12.03   | 0.000   | 1.02 |
| Stiffness*IL13 | -0.0962 | -0.0481 | 0.0464  | -1.04   | 0.320   | 1.02 |

## Regression Equation in Uncoded Units

$$\text{CD206} = 1.7662 + 0.1601 \text{ Stiffness} + 0.5580 \text{ IL13} - 0.0481 \text{ Stiffness*IL13}$$

**Table S4: DOE analysis of normalized CD206 marker expression:** Two-way ANOVA was performed to identify the significance of each term in promoting increased normalized CD206 MFI.

### Coded Coefficients

| Term           | Effect   | Coef     | SE Coef | T-Value | P-Value | VIF  |
|----------------|----------|----------|---------|---------|---------|------|
| Constant       |          | 0.76460  | 0.00716 | 106.77  | 0.000   |      |
| Stiffness      | -0.13866 | -0.06933 | 0.00716 | -9.68   | 0.000   | 1.00 |
| IL13           | -0.25020 | -0.12510 | 0.00716 | -17.47  | 0.000   | 1.00 |
| Stiffness*IL13 | 0.08195  | 0.04097  | 0.00716 | 5.72    | 0.000   | 1.00 |

### Regression Equation in Uncoded Units

$$\text{CD86} = 0.76460 - 0.06933 \text{ Stiffness} - 0.12510 \text{ IL13} + 0.04097 \text{ Stiffness*IL13}$$

**Table S5: DOE analysis of normalized CD86 marker expression:** Two-way ANOVA was performed to identify the significance of each term in promoting decreased normalized CD86 MFI.



### Coded Coefficients

| Term           | Effect  | Coef    | SE Coef | T-Value | P-Value | VIF  |
|----------------|---------|---------|---------|---------|---------|------|
| Constant       |         | 0.8584  | 0.0155  | 55.46   | 0.000   |      |
| Stiffness      | -0.2556 | -0.1278 | 0.0155  | -8.25   | 0.000   | 1.00 |
| IL13           | 0.0537  | 0.0268  | 0.0155  | 1.73    | 0.121   | 1.00 |
| Stiffness*IL13 | 0.0812  | 0.0406  | 0.0155  | 2.62    | 0.030   | 1.00 |

### Regression Equation in Uncoded Units

$$\text{CD80} = 0.8584 - 0.1278 \text{ Stiffness} + 0.0268 \text{ IL13} + 0.0406 \text{ Stiffness*IL13}$$

**Table S6: DOE analysis of normalized CD80 marker expression:** Two-way ANOVA was performed to identify the significance of each term in promoting decreased normalized CD80 MFI.

### Coded Coefficients

| Term           | Effect  | Coef    | SE Coef | T-Value | P-Value | VIF  |
|----------------|---------|---------|---------|---------|---------|------|
| Constant       |         | 1.2025  | 0.0308  | 39.01   | 0.000   |      |
| Stiffness      | -0.0770 | -0.0385 | 0.0308  | -1.25   | 0.236   | 1.00 |
| IL13           | 0.4343  | 0.2172  | 0.0308  | 7.05    | 0.000   | 1.00 |
| Stiffness*IL13 | -0.0477 | -0.0238 | 0.0308  | -0.77   | 0.454   | 1.00 |

### Regression Equation in Uncoded Units

$$\text{TGF-}\beta = 1.2025 - 0.0385 \text{ Stiffness} + 0.2172 \text{ IL13} - 0.0238 \text{ Stiffness*IL13}$$

**Table S7: DOE analysis of normalized TGF- $\beta$  secretion:** Two-way ANOVA was performed to identify the significance of each term in normalized TGF- $\beta$  secretion.

## Coded Coefficients

| Term           | Effect  | Coef    | SE Coef | T-Value | P-Value | VIF  |
|----------------|---------|---------|---------|---------|---------|------|
| Constant       |         | 1.1118  | 0.0205  | 54.26   | 0.000   |      |
| Stiffness      | -0.0622 | -0.0311 | 0.0205  | -1.52   | 0.157   | 1.01 |
| IL13           | 0.2137  | 0.1068  | 0.0205  | 5.21    | 0.000   | 1.01 |
| Stiffness*IL13 | -0.0721 | -0.0360 | 0.0205  | -1.76   | 0.106   | 1.01 |

## Regression Equation in Uncoded Units

$$\text{CCL2} = 1.1118 - 0.0311 \text{ Stiffness} + 0.1068 \text{ IL13} - 0.0360 \text{ Stiffness*IL13}$$

**Table S8: DOE analysis of normalized CCL2 secretion:** Two-way ANOVA was performed to identify the significance of each term in normalized CCL2 secretion.

## Coded Coefficients

| Term           | Effect  | Coef    | SE Coef | T-Value | P-Value | VIF  |
|----------------|---------|---------|---------|---------|---------|------|
| Constant       |         | 0.8416  | 0.0433  | 19.45   | 0.000   |      |
| Stiffness      | -0.1625 | -0.0812 | 0.0433  | -1.88   | 0.085   | 1.00 |
| IL13           | -0.1776 | -0.0888 | 0.0433  | -2.05   | 0.063   | 1.00 |
| Stiffness*IL13 | -0.0232 | -0.0116 | 0.0433  | -0.27   | 0.793   | 1.00 |

## Regression Equation in Uncoded Units

$$\text{TNF-}\alpha = 0.8416 - 0.0812 \text{ Stiffness} - 0.0888 \text{ IL13} - 0.0116 \text{ Stiffness*IL13}$$

**Table S9: DOE analysis of normalized TNF- $\alpha$  secretion:** Two-way ANOVA was performed to identify the significance of each term in normalized TNF- $\alpha$  secretion.

## Coded Coefficients

| Term           | Effect  | Coef    | SE Coef | T-Value | P-Value | VIF  |
|----------------|---------|---------|---------|---------|---------|------|
| Constant       |         | 0.7754  | 0.0898  | 8.63    | 0.000   |      |
| Stiffness      | -0.3155 | -0.1578 | 0.0898  | -1.76   | 0.107   | 1.01 |
| IL13           | -0.2248 | -0.1124 | 0.0898  | -1.25   | 0.237   | 1.01 |
| Stiffness*IL13 | -0.0912 | -0.0456 | 0.0898  | -0.51   | 0.622   | 1.01 |

## Regression Equation in Uncoded Units

$$\text{IL-1}\beta = 0.7754 - 0.1578 \text{ Stiffness} - 0.1124 \text{ IL13} - 0.0456 \text{ Stiffness*IL13}$$

**Table S10: DOE analysis of normalized IL-1 $\beta$  secretion:** Two-way ANOVA was performed to identify the significance of each term in normalized TNF- $\alpha$  secretion

## Coded Coefficients

| Term           | Effect | Coef   | SE Coef | T-Value | P-Value | VIF  |
|----------------|--------|--------|---------|---------|---------|------|
| Constant       |        | 43.830 | 0.540   | 81.09   | 0.000   |      |
| Stiffness      | -5.325 | -2.663 | 0.540   | -4.93   | 0.001   | 1.02 |
| IL13           | -3.483 | -1.741 | 0.540   | -3.22   | 0.009   | 1.00 |
| Stiffness*IL13 | 0.502  | 0.251  | 0.540   | 0.46    | 0.652   | 1.02 |

## Regression Equation in Uncoded Units

$$\%PC \text{ +ve cells} = 43.830 - 2.663 \text{ Stiffness} - 1.741 \text{ IL13} + 0.251 \text{ Stiffness*IL13}$$

**Table S11: DOE analysis of %PC +ve cells.** Two-way ANOVA was performed to identify the significance of each term in regulating uptake of phosphatidylcholine (PC) coated particles

## Coded Coefficients

| Term           | Effect  | Coef    | SE Coef | T-Value | P-Value | VIF  |
|----------------|---------|---------|---------|---------|---------|------|
| Constant       |         | 0.8582  | 0.0144  | 59.65   | 0.000   |      |
| Stiffness      | -0.1649 | -0.0825 | 0.0144  | -5.73   | 0.000   | 1.02 |
| IL13           | -0.1170 | -0.0585 | 0.0144  | -4.06   | 0.002   | 1.00 |
| Stiffness*IL13 | 0.0018  | 0.0009  | 0.0144  | 0.06    | 0.952   | 1.02 |

## Regression Equation in Uncoded Units

$$\text{Normalized MFI} = 0.8582 - 0.0825 \text{ Stiffness} - 0.0585 \text{ IL13} + 0.0009 \text{ Stiffness*IL13}$$

**Table S12: DOE analysis of normalized MFI for phagocytosis assay.** Two-way ANOVA was performed to identify the significance of each term in modulating normalized MFI for phagocytosis assay.

## Coded Coefficients

| Term           | Effect | Coef   | SE Coef | T-Value | P-Value | VIF  |
|----------------|--------|--------|---------|---------|---------|------|
| Constant       |        | 56.188 | 0.715   | 78.53   | 0.000   |      |
| Stiffness      | -7.558 | -3.779 | 0.715   | -5.28   | 0.001   | 1.00 |
| IL13           | -3.428 | -1.714 | 0.715   | -2.40   | 0.043   | 1.00 |
| Stiffness*IL13 | 2.472  | 1.236  | 0.715   | 1.73    | 0.122   | 1.00 |

## Regression Equation in Uncoded Units

$$\%PS \text{ +ve cells} = 56.188 - 3.779 \text{ Stiffness} - 1.714 \text{ IL13} + 1.236 \text{ Stiffness*IL13}$$

**Table S13: DOE analysis of %PS +ve cells.** Two-way ANOVA was performed to identify the significance of each term in regulating uptake of phosphatidylserine (PS) coated particles



### Coded Coefficients

| Term           | Effect  | Coef    | SE Coef | T-Value | P-Value | VIF  |
|----------------|---------|---------|---------|---------|---------|------|
| Constant       |         | 0.7858  | 0.0134  | 58.51   | 0.000   |      |
| Stiffness      | -0.2304 | -0.1152 | 0.0134  | -8.58   | 0.000   | 1.00 |
| IL13           | -0.1115 | -0.0558 | 0.0134  | -4.15   | 0.003   | 1.00 |
| Stiffness*IL13 | 0.0865  | 0.0433  | 0.0134  | 3.22    | 0.012   | 1.00 |

### Regression Equation in Uncoded Units

$$\text{Normalized MFI} = 0.7858 - 0.1152 \text{ Stiffness} - 0.0558 \text{ IL13} + 0.0433 \text{ Stiffness*IL13}$$

**Table S14: DOE analysis of normalized MFI for efferocytosis assay.** Two-way ANOVA was performed to identify the significance of each term in modulating normalized MFI for efferocytosis assay.

| Predicted CD80 normalized MFI | Measured CD80 normalized MFI | Predicted CD86 normalized MFI | Measured CD86 normalized MFI |
|-------------------------------|------------------------------|-------------------------------|------------------------------|
| 0.83                          | 0.84 ± 0.07                  | 0.89                          | 0.88 ± 0.03                  |

**Table S15: Validation of DOE model using CD80 and CD86 normalized marker expression.** DOE model for CD80 and CD86 marker expression was validated on MH-S cells cultured on hydrogels ( $E \sim 10\text{-}12$  kPa) without IL13.
